# Supplementary material for: Multi-emitting fluorescence sensor of MnO2–OPD–QD for the multiplex and visual detection of ascorbic acid and alkaline phosphatase
Source: Royal Society of Chemistry journal article supplement (doi:10.1039/c9tc07072a), 2020-01-01
Supplement: c9tc07072a1.pdf [file c9tc07072a1.pdf]

## Supporting Information

# **Multi-emitting fluorescence sensor of MnO<sub>2</sub>-OPD-QDs for the multiplexed and visual detection of ascorbic acid and alkaline phosphatase**

Qian Yang,<sup>a,b</sup> Chuyao Li,<sup>a,b</sup> Jinhua Li,<sup>b</sup> Maryam Arabi,<sup>b</sup> Xiaoyan Wang,<sup>b,c</sup> Hailong Peng,<sup>a</sup> Hua Xiong,<sup>\*a</sup> Jaebum Choo<sup>\*e</sup> and Lingxin Chen<sup>\*b,c,d</sup>

<sup>a</sup> State Key Laboratory of Food Science and Technology, Nanchang University, Nanchang 330047, China

<sup>b</sup> CAS Key Laboratory of Coastal Environmental Processes and Ecological Remediation; Research Center for Coastal Environmental Engineering and Technology, Yantai Institute of Coastal Zone Research, Chinese Academy of Sciences, Yantai 264003, China

<sup>c</sup> School of Pharmacy, Binzhou Medical University, Yantai 264003, China

<sup>d</sup> Center for Ocean Mega-Science, Chinese Academy of Sciences, Qingdao 266071, China

<sup>e</sup> Department of Chemistry, Chung-Ang University, Seoul 06974, South Korea

\* Corresponding authors.

E-mail addresses: huaxiong100@126.com (H. Xiong); jbchoo@cau.ac.kr (J. Choo); lxchen@yic.ac.cn (L. Chen).

## **Contents**

### **1. Related descriptions**

### **2. Figures S1–S9**

### **3. Table S1**

## 1. Related descriptions

### Synthesis of red-fluorescent CdTe/ZnS QDs (r-QDs)

Red-fluorescent CdTe QDs were firstly synthesized according to the previous work.<sup>1</sup> In brief, 68.4 mg of  $\text{CdCl}_2 \cdot 5\text{H}_2\text{O}$  and 78.5  $\mu\text{L}$  of MPA were mixed in 75 mL of ultrapure water to form the cadmium precursor, with pH adjusted to 9.0 and stirring under  $\text{N}_2$  for 30 min. Then, 1 mL of freshly prepared NaHTe aqueous solution (with 40 mg of  $\text{NaBH}_4$  and 38.3 mg of tellurium powder reacting in ethanol-water solution (1.5mL/0.5mL) at 40 °C for 4 h) was expeditiously injected into the above reaction system under stirring. The solution was heated and refluxed for 24 h to obtain the red-fluorescent CdTe QDs. Next, the red-fluorescent CdTe/ZnS QDs were prepared by the situ growth of ZnS shell onto the red-fluorescent CdTe QDs.<sup>2</sup> Briefly, 8 mL of as-prepared red-fluorescent CdTe QDs was added to 25 mL solution containing 1  $\text{mmol} \cdot \text{L}^{-1}$   $\text{ZnCl}_2$  and 4  $\text{mmol} \cdot \text{L}^{-1}$  GSH. After being adjusted to pH 8, the mixture was heated to 100 °C under open-air conditions and refluxed for 30 min. (*Reagents and materials* Tellurium and sodium borohydride ( $\text{NaBH}_4$ ) were offered by Sigma-Aldrich (Shanghai, China). 3-Mercaptopropionic acid (MPA) and reduced glutathione (GSH) was supplied by Aladdin (Shanghai, China). Cadmium chloride pentahydrate ( $\text{CdCl}_2 \cdot 5\text{H}_2\text{O}$ ), zinc chloride ( $\text{ZnCl}_2$ ), sodium hydroxide ( $\text{NaOH}$ ) and ethanol were provided by Sinopharm Chemical Reagent Co. Ltd. (Shanghai, China).)

## References

1. M.Y. Gao, S. Kirstein, H. Mohwald, A.L. Rogach, A. Kornowski, A. Eychmuller and H. Weller, *J. Phys. Chem. B*, 1998, **102**, 8360–8363.
2. Y. Liu and J. Yu, *J. Colloid Interf. Sci.*, 2010, **351**, 1–9.

## 2. Figures

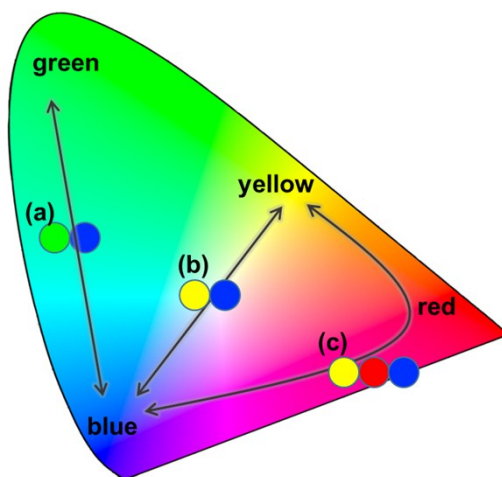

**Fig. S1** Chromaticity diagram to indicate the color variation ranges of (a) green- and blue-emission, (b) yellow- and blue-emission, and (c) yellow-, red- and blue-emission based fluorescence sensors.

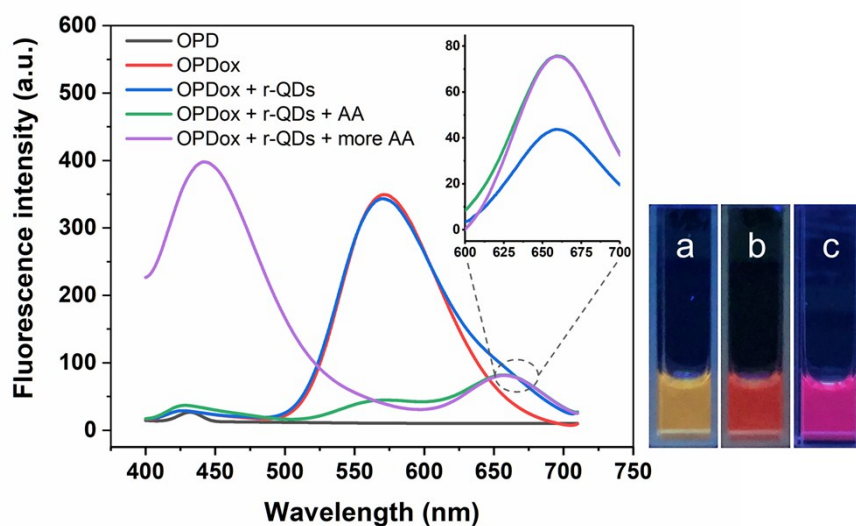

**Fig. S2** Fluorescence spectra of OPD (black line), OPDox (red line) and its mixture with r-QDs in the absence (blue line) or presence (green and purple lines) of AA. Inset: fluorescence spectra of r-QDs after eliminating the spectral overlap effect of yellow emission peak, of the mixture of OPDox and r-QDs in the absence (blue line) or presence (green and purple lines) of AA, respectively. Right: fluorescence images of mixture of OPDox and r-QDs in the absence (a) and presence (b, c) of AA, respectively.

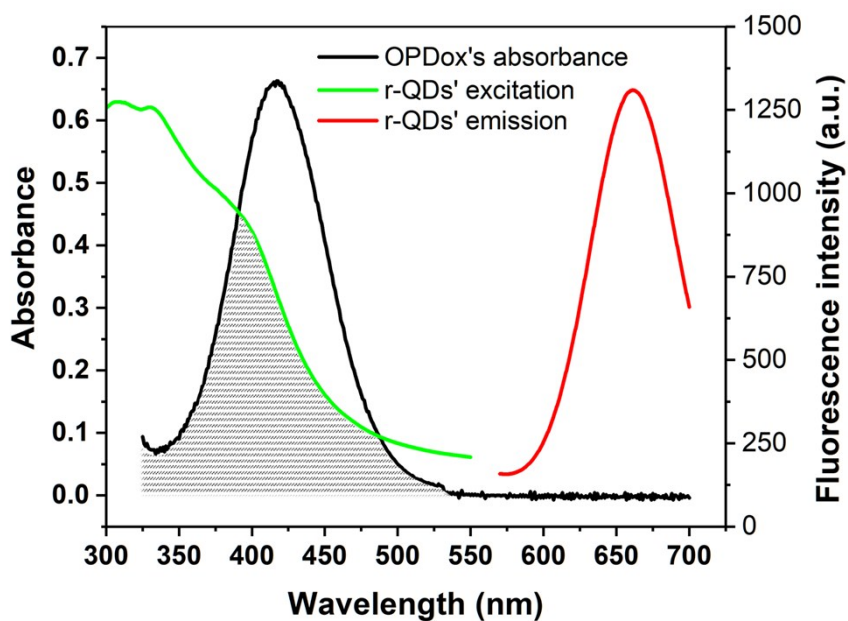

**Fig. S3** Absorbance spectrum of OPDox (black line), fluorescence excitation spectrum (green line) and emission spectrum (red line) of r-QDs, and the spectral overlap between OPDox's absorbance and r-QDs' excitation.

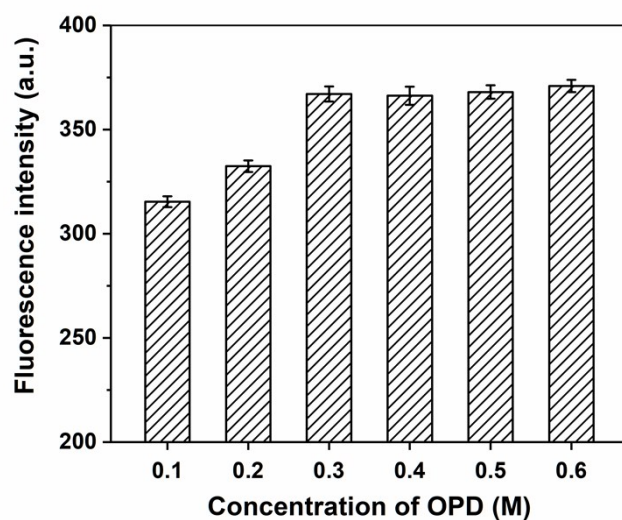

**Fig. S4** Fluorescence intensity of OPDox prepared with different concentrations of OPD.

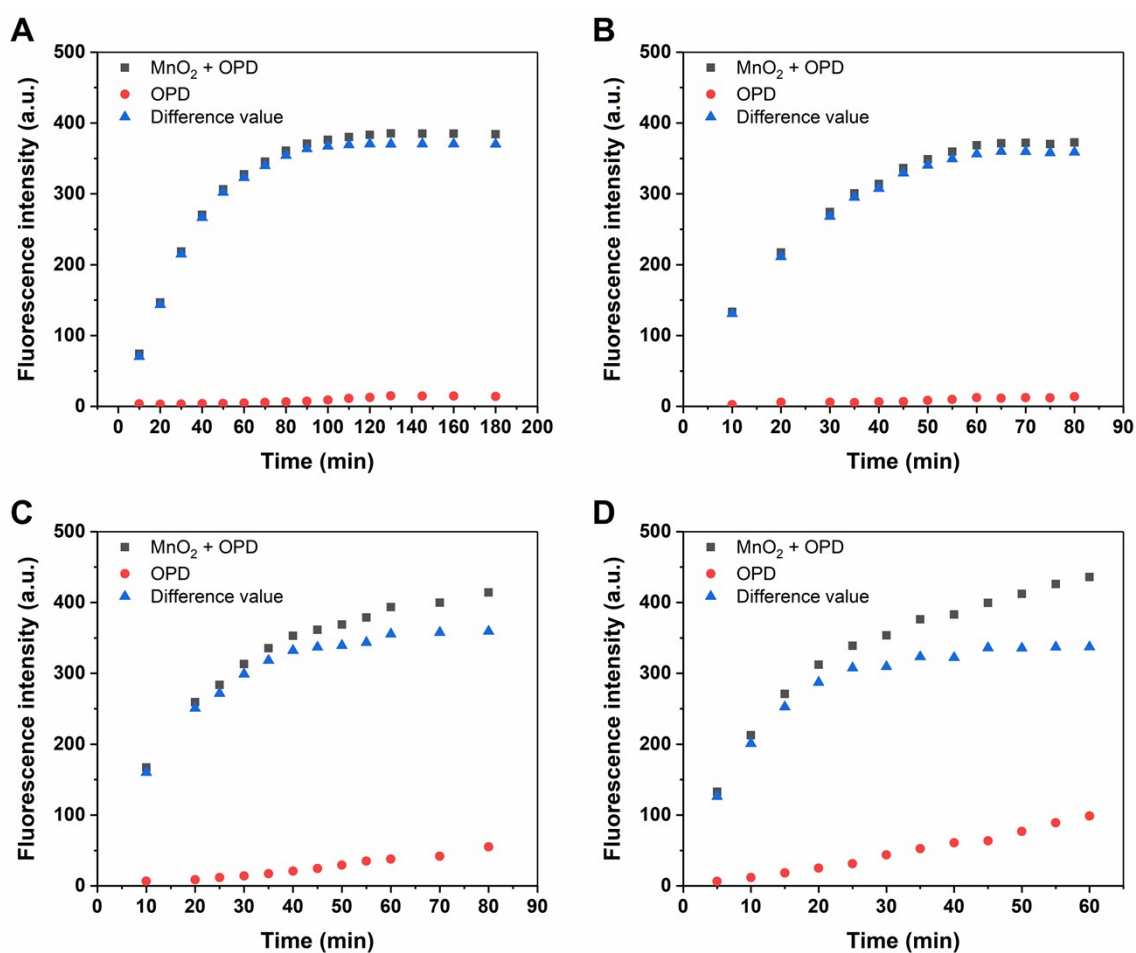

**Fig. S5** Reaction time-dependent fluorescence intensity change of OPDox synthesized at different reaction temperature of (A) 30 °C, (B) 40 °C, (C) 50 °C and (D) 60 °C.

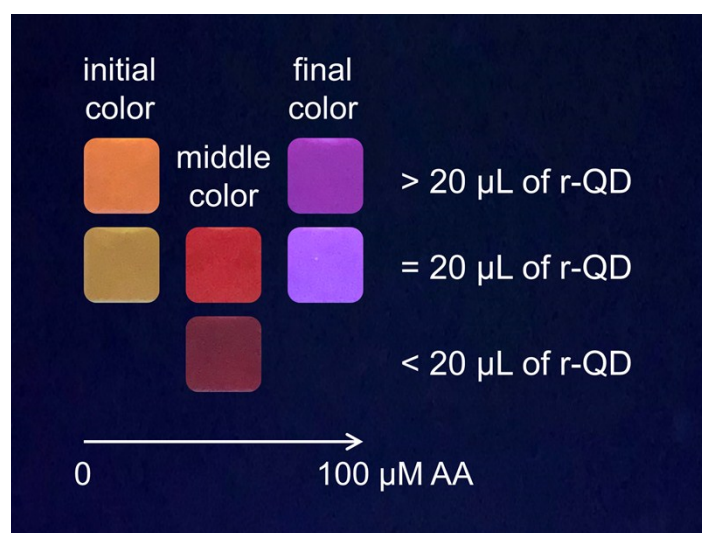

**Fig. S6** Fluorescence colors of MnO<sub>2</sub>-OPD-QDs sensors containing different volumes of r-QDs before and after interaction with AA.

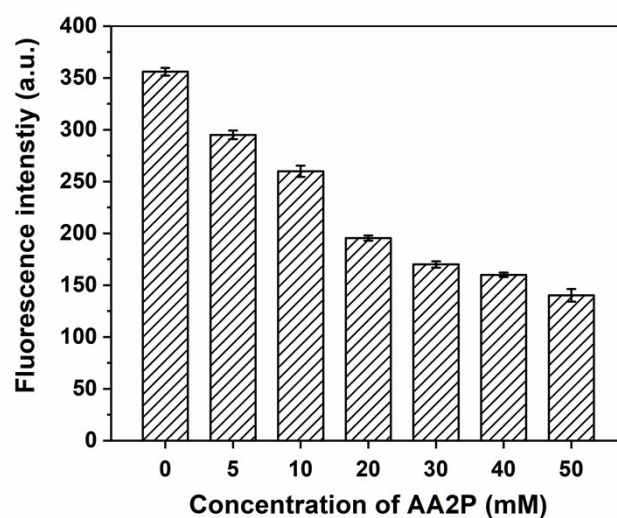

**Fig. S7** Fluorescence intensity of OPDox provided by the MnO<sub>2</sub>-OPD-QDs sensor with increasing concentration of AA2P.

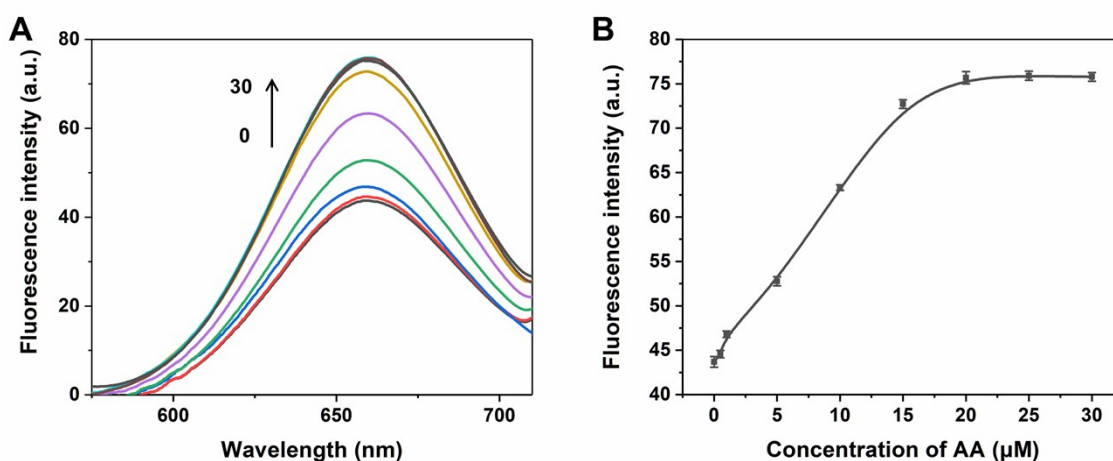

**Fig. S8** (A) Fluorescence spectra and (B) intensities of r-QDs after eliminating the effect of spectral overlap with increasing concentration of AA (from 0 to 30 μM).

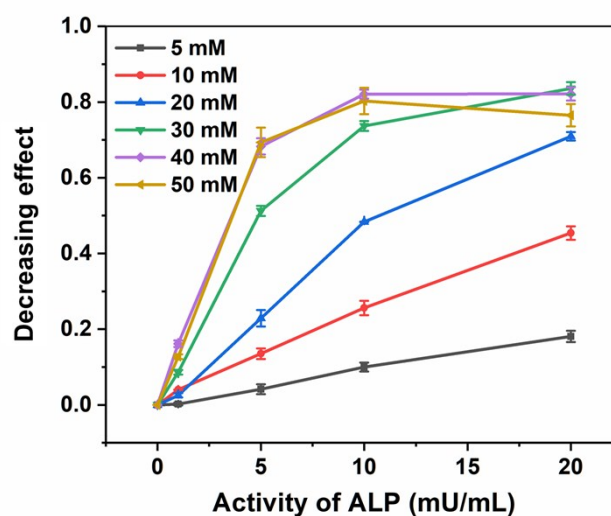

**Fig. S9** Fluorescence intensity decreasing effect of OPDox in the MnO<sub>2</sub>-OPD-QDs sensor with increasing activity of ALP and increasing concentration of AA2P (5, 10, 20, 30, 40 and 50 mM).

### 3. Table

**Table S1** The nonlinear fitting curves for the ratiometric fluorescence intensity change of blue- and yellow-emission peaks in Fig. 4, *i.e.*,  $(I_{441}/I_{569})/(I_{441}/I_{569})_0$ , and the related parameter values

|                 | line A (ternary-emission)                 | line B (dual-emission)                    |
|-----------------|-------------------------------------------|-------------------------------------------|
| model           | logistic                                  | logistic                                  |
| equation        | $y = A2 + (A1 - A2) / (1 + (x / x0) ^ p)$ | $y = A2 + (A1 - A2) / (1 + (x / x0) ^ p)$ |
| A1              | $2.23564 \pm 0.92572$                     | $2.65482 \pm 1.07491$                     |
| A2              | $101.38703 \pm 1.7115$                    | $118.51309 \pm 1.8406$                    |
| x0              | $37.55776 \pm 0.72186$                    | $37.79741 \pm 0.66606$                    |
| p               | $3.99263 \pm 0.2533$                      | $4.41419 \pm 0.28306$                     |
| reduced Chi-Sqr | 4.77464                                   | 6.76023                                   |
| r-square (COD)  | 0.99786                                   | 0.99787                                   |
| Adj. r-square   | 0.99733                                   | 0.99734                                   |
